# Supplementary material
Source: PubMed Central journal article supplement (PMC3081962)
Supplement: NIHMS252314-supplement-01.pdf [file NIHMS252314-supplement-01.pdf]

Supplemental Information

**Table S1.** Descriptive Information (Mean, Standard Deviation) of Sample, by Study Group

|                            | <b>Controls<br/>N = 24</b> | <b>Siblings<br/>N = 26</b> | <b>VCFS<br/>N = 72</b> |
|----------------------------|----------------------------|----------------------------|------------------------|
| Gender, female (number, %) | 9 (37.5)                   | 12 (46.2)                  | 35 (48.6)              |
| Age, Time 1                | 11.8 (1.9)                 | 12.2 (2.1)                 | 11.8 (2.1)             |
| Age, Time 2                | 15.0 (1.9)                 | 15.2 (2.0)                 | 15.1 (2.1)             |
| FSIQ, Time 1               | 94.5 (14.0)                | 104.9 (14.6)               | 70.9 (13.9)            |
| FSIQ, Time 2               | 96.8 (11.5)                | 104.1 (13.1)               | 68.5 (14.9)            |
| SOPS, Total                | 3.0 (5.2)                  | 0.40 (0.8)                 | 6.4 (9.7)              |
| SOPS, Positive Symptoms    | 0.5 (1.4)                  | 0.04 (0.20)                | 1.2 (2.7)              |
| Years Between Timepoints   | 3.1 (0.35)                 | 3.1 (0.43)                 | 3.3 (0.57)             |

FSIQ, Full-scale IQ; SOPS, Scale of Prodromal Symptoms; VCFS, velocardiofacial syndrome

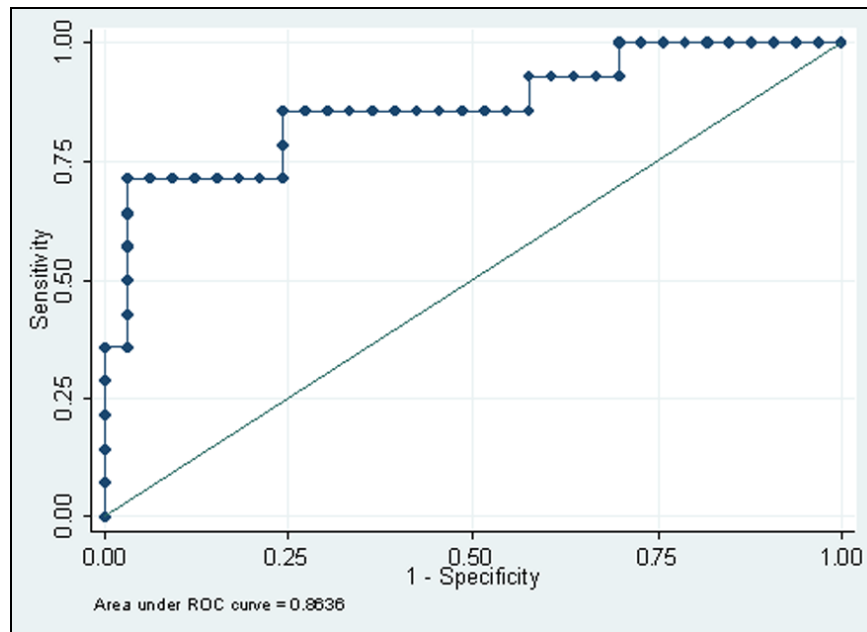

**Figure S1.** This graph depicts the Receiver Operating Characteristic (ROC) curve for a linear combination of neuroanatomic change scores (the logit score predictor) (excluding overall cranial gray and white matter) as a predictor of SOPS Prodromal Status at Time 2. SOPS, Scale of Prodromal Symptoms.
